# Supplementary material for: The Trade-Off between Optimizing Flight Patterns and Human Health: A Case Study of Aircraft Noise in Queens, NY, USA
Source: MDPI journal article supplement (doi:10.3390/ijerph15081753), 2018-08-15
Supplement: s1 [file s1]

## Online Technical Appendix

### **The trade-off between aircraft flight efficiency and human health: a case study of aircraft noise in Queens, NY**

Authors: Zafar Zafari, M.Sc., PhD<sup>1\*</sup>; Boshen Jiao MPH<sup>1</sup>; Brian Will, B.Sc.<sup>2</sup>; Shukai Li, B.Sc.<sup>1</sup>; Peter Alexander Muennig, MD, MPH<sup>1</sup>

#### Affiliations:

1. Health Policy and Management, Mailman School of Public Health, Columbia University, USA
2. Queens Quiet Skies, PO Box 604888, Bayside, NY 11360-4888, USA

#### **Online Appendix 1: The trajectories of the TNNIS and the Whitestone Climbs at LaGuardia Airport (LGA)**

**Figure S1:** The trajectory of the Whitestone Climb at LaGuardia Airport (LGA)

**Figure S2:** The trajectory of the TNNIS Climb at LaGuardia Airport (LGA)

#### **Online Appendix 2: Population estimate of persons of Community Boards 7 and 11 of Queens, NY, within the 60 and 65 db DNL noise contour under the TNNIS climb**

**Figure S3:** Number of persons in each census tract within the 60 db DNL noise contour

**Figure S4:** Number of persons in each census tract within the 65 db DNL noise contour

**Online Appendix 1:** The trajectories of the TNNIS and the Whitestone Climbs at LaGuardia Airport (LGA)

**Figure S1.** The trajectories of the TNNIS and the Whitestone Climbs at LaGuardia Airport (LGA)

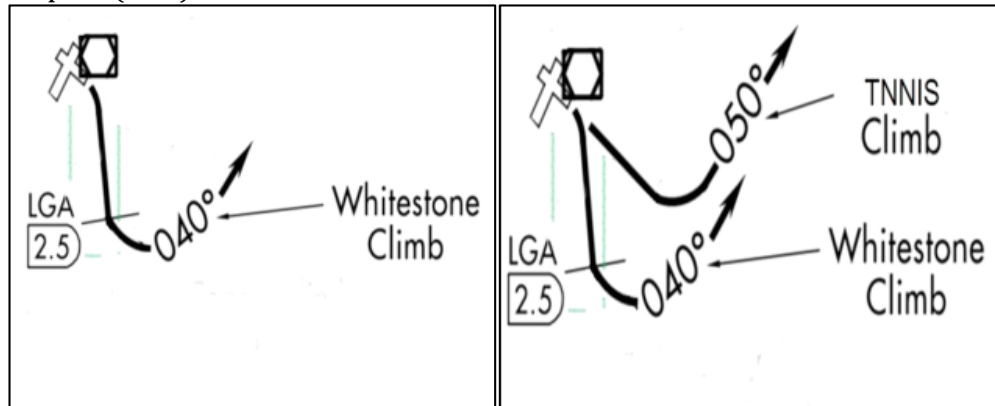

This figure is sourced from the Federal Aviation Administration [1].

**Appendix 2:** Population estimate of persons of Community Boards 7 and 11 of Queens, NY, within the 60 and 65 dB DNL noise contour under the TNNIS Climb

The estimates for the 60 and 65 dB DNL noise contours were derived from the Port Authority of New York and New Jersey [2]. In addition, the estimates of population were taken from individual census tracts tabulated for the 2010 federal census [3]. We used the map of 60 and 65 dB DNL noise contours to overlay onto a census tract map of northeast Queens, NY. Census tracts outside of the most recently published 60 and 65 dB DNL were not included. In addition, because the focus of this paper was TNNIS Climb, census tracts that could have been influenced by other major departure routes such as the Whitestone Climb were not included. Using this method, we were able to estimate the population of census tracts within the 60 and 65 dB DNL noise contours as 83,807, and 31,329, respectively. *Figures S2 and S3* show the details of number of persons in different census tracts affected by noise contours 60, and 65 dB DNL, respectively.



**Figure S2.** Number of persons in each census tract within the 60 dB DNL noise contour

| Census Tract | # Of Persons |
|--------------|--------------|
| 919          | 5,766        |
| 907          | 1,355        |
| 383.01       | 0            |
| 869          | 2,131        |
| 865          | 4,514        |
| 871          | 1,752        |
| 849          | 7,642        |
| 853          | 5,764        |
| 855          | 6,649        |
| 863          | 7,277        |
| 857          | 5,953        |
| 861          | 2,370        |
| 1189         | 2,468        |
| 1201         | 1,668        |
| 859          | 5,873        |
| 797.01       | 7,055        |
| 797.02       | 4,502        |
| 799          | 3,425        |
| 803.01       | 4,382        |
| 803.02       | 3,504        |
| 793          | 1            |
| 383.02       | 56           |

**Total population of census tracts within 60DNL: 83,807 persons**

dB DNL: dB averaged for a 24-hour 'day and night' period.

**Figure S3.** Number of persons in each census tract within the 65 dB DNL noise contour

| Census Tract                                                      | # of Persons | Census Tract                    | # of Persons | Census Tract                    | # of Persons | Census Tract                                                                                          | # of Persons | Census Tract                 | # of Persons |
|-------------------------------------------------------------------|--------------|---------------------------------|--------------|---------------------------------|--------------|-------------------------------------------------------------------------------------------------------|--------------|------------------------------|--------------|
| Tract # 317,<br>Block # 1008                                      | 416          | Tract # 357,<br>Block # 1002    | 141          | Tract # 327,<br>Block # 1002    | 381          | Tract # 289,<br>Block # 1001                                                                          | 137          | Tract # 871,<br>Block # 1000 | 21           |
| Tract # 317,<br>Block # 2000                                      | 230          | Tract # 357,<br>Block # 2003    | 220          | Tract # 327,<br>Block # 1001    | 473          | Tract # 289,<br>Block # 1003                                                                          | 708          | Tract # 853,<br>Block # 2000 | 262          |
| Tract # 317,<br>Block # 3001                                      | 126          | Tract # 329,<br>Block # 1005    | 118          | Tract # 309.03,<br>Block # 3001 | 463          | Tract # 291,<br>Block # 2000                                                                          | 637          | Tract # 853,<br>Block # 1002 | 675          |
| Tract # 309.04,<br>Block # 1003                                   | 106          | Tract # 329,<br>Block # 1006    | 115          | Tract # 309.03,<br>Block # 3002 | 279          | Tract # 291,<br>Block # 2001                                                                          | 429          | Tract # 853,<br>Block # 1001 | 298          |
| Tract # 309.04,<br>Block # 1002                                   | 53           | Tract # 329,<br>Block # 3006    | 98           | Tract # 309.03,<br>Block # 3003 | 186          | Tract # 291,<br>Block # 2002                                                                          | 506          | Tract # 871,<br>Block # 1002 | 187          |
| Tract # 329,<br>Block # 3001                                      | 20           | Tract # 329,<br>Block # 3007    | 163          | Tract # 309.03,<br>Block # 3004 | 226          | Tract # 291,<br>Block # 2003                                                                          | 457          | Tract # 871,<br>Block # 2004 | 9            |
| Tract # 329,<br>Block # 3000                                      | 4            | Tract # 329,<br>Block # 3003    | 179          | Tract # 309.03,<br>Block # 3005 | 201          | Tract # 291,<br>Block # 2004                                                                          | 0            | Tract # 853,<br>Block # 1000 | 0            |
| Tract # 329,<br>Block # 1007                                      | 68           | Tract # 309.04,<br>Block # 1010 | 276          | Tract # 309.03,<br>Block # 3006 | 246          | Tract # 293,<br>Block # 1007                                                                          | 0            | Tract # 871,<br>Block # 2011 | 0            |
| Tract # 329,<br>Block # 3005                                      | 0            | Tract # 309.04,<br>Block # 1011 | 131          | Tract # 309.02,<br>Block # 3000 | 404          | Tract # 293,<br>Block # 1006                                                                          | 215          | Tract # 871,<br>Block # 2009 | 20           |
| Tract # 329,<br>Block # 1001                                      | 0            | Tract # 309.04,<br>Block # 1008 | 30           | Tract # 309.02,<br>Block # 3001 | 13           | Tract # 293,<br>Block # 1005                                                                          | 317          | Tract # 871,<br>Block # 2000 | 7            |
| Tract # 329,<br>Block # 1002                                      | 163          | Tract # 309.04,<br>Block # 1012 | 78           | Tract # 309.02,<br>Block # 4003 | 364          | Tract # 291,<br>Block # 4000                                                                          | 462          | Tract # 871,<br>Block # 2007 | 207          |
| Tract # 329,<br>Block # 1003                                      | 207          | Tract # 309.04,<br>Block # 2005 | 303          | Tract # 309.02,<br>Block # 4002 | 467          | Tract # 291,<br>Block # 4004                                                                          | 0            | Tract # 871,<br>Block # 2002 | 170          |
| Tract # 329,<br>Block # 1000                                      | 225          | Tract # 309.04,<br>Block # 2004 | 397          | Tract # 309.02,<br>Block # 4001 | 268          | Tract # 293,<br>Block # 1008                                                                          | 0            | Tract # 869,<br>Block # 1014 | 72           |
| Tract # 347,<br>Block # 2005                                      | 105          | Tract # 309.04,<br>Block # 2003 | 110          | Tract # 309.02,<br>Block # 4000 | 331          | Tract # 293,<br>Block # 1009                                                                          | 127          | Tract # 869,<br>Block # 1009 | 56           |
| Tract # 329,<br>Block # 2001                                      | 229          | Tract # 309.04,<br>Block # 2002 | 12           | Tract # 309.03,<br>Block # 1006 | 408          | Tract # 293,<br>Block # 1010                                                                          | 0            | Tract # 869,<br>Block # 1004 | 173          |
| Tract # 329,<br>Block # 2000                                      | 305          | Tract # 309.04,<br>Block # 2001 | 361          | Tract # 309.03,<br>Block # 1005 | 269          | Tract # 261,<br>Block # 1002                                                                          | 335          | Tract # 869,<br>Block # 1005 | 20           |
| Tract # 347,<br>Block # 2011                                      | 353          | Tract # 309.04,<br>Block # 2000 | 373          | Tract # 309.03,<br>Block # 1004 | 372          | Tract # 261,<br>Block # 1001                                                                          | 180          | Tract # 869,<br>Block # 2014 | 111          |
| Tract # 347,<br>Block # 1002                                      | 278          | Tract # 329,<br>Block # 3010    | 321          | Tract # 309.03,<br>Block # 1003 | 306          | Tract # 261,<br>Block # 1000                                                                          | 716          | Tract # 907,<br>Block # 1026 | 3            |
| Tract # 347,<br>Block # 2007                                      | 199          | Tract # 329,<br>Block # 3008    | 195          | Tract # 293,<br>Block # 1000    | 0            | Tract # 263,<br>Block # 1001                                                                          | 36           | Tract # 907,<br>Block # 1025 | 35           |
| Tract # 347,<br>Block # 2008                                      | 249          | Tract # 329,<br>Block # 3009    | 0            | Tract # 291,<br>Block # 1005    | 0            | Tract # 261,<br>Block # 2000                                                                          | 693          | Tract # 919,<br>Block # 1006 | 536          |
| Tract # 347,<br>Block # 2010                                      | 320          | Tract # 309.03,<br>Block # 2005 | 289          | Tract # 291,<br>Block # 1004    | 76           | Tract # 261,<br>Block # 3001                                                                          | 800          | Tract # 919,<br>Block # 1007 | 51           |
| Tract # 357,<br>Block # 1001                                      | 0            | Tract # 309.03,<br>Block # 2004 | 33           | Tract # 291,<br>Block # 1003    | 247          | Tract # 261,<br>Block # 3000                                                                          | 1,280        | Tract # 919,<br>Block # 1008 | 33           |
| Tract # 347,<br>Block # 2009                                      | 270          | Tract # 309.03,<br>Block # 2003 | 279          | Tract # 291,<br>Block # 1002    | 364          | Tract # 261,<br>Block # 4004                                                                          | 230          | Tract # 919,<br>Block # 1004 | 163          |
| Tract # 357,<br>Block # 1009                                      | 9            | Tract # 309.03,<br>Block # 2002 | 393          | Tract # 291,<br>Block # 1001    | 404          | Tract # 261,<br>Block # 4003                                                                          | 297          | Tract # 919,<br>Block # 1005 | 196          |
| Tract # 347,<br>Block # 1001                                      | 247          | Tract # 309.03,<br>Block # 2001 | 332          | Tract # 291,<br>Block # 1000    | 330          | Tract # 871,<br>Block # 1003<br>(St. Anthony's Park)<br>Tract # 871,<br>Block # 1001<br>(City Housing | 748          | Tract # 919,<br>Block # 1003 | 309          |
| Tract # 357,<br>Block # 1008                                      | 285          | Tract # 309.03,<br>Block # 2000 | 381          | Tract # 289,<br>Block # 1002    | 288          | Tract # 261,<br>Block # 1001                                                                          | 1,071        | Tract # 919,<br>Block # 3012 | 182          |
| <b>Total population of census tracts within 65 db DNL: 31,329</b> |              |                                 |              |                                 |              |                                                                                                       |              |                              |              |

db DNL: dB averaged for a 24-hour 'day and night' period.



## References

- 1 Federal Aviation Administration. LaGuardia five departure.  
<http://aeronav.faa.gov/d-tpp/1807/00289LAGUARDIA.PDF> (accessed 2 Jul 2018).
- 2 Port authority NY/NJ noise contour map for LaGuardia airport (official noise exposure results of the 14 CFR Part 150 study), meeting presentation for June 21st, 2016. [http://panynjpart150.com/LGA\\_TAC.asp](http://panynjpart150.com/LGA_TAC.asp) (accessed 1 Mar 2018).
- 3 2010 New York City population by census tracts. NYC Open Data.  
<https://data.cityofnewyork.us/City-Government/2010-NYC-Population-by-Census-Tracts/si4q-zuzm> (accessed 1 Mar 2018).
